# Supplementary material for: Short-term treatment with multi-drug regimens combining BRAF/MEK-targeted therapy and immunotherapy results in durable responses in Braf-mutated melanoma
Source: PubMed Central journal article supplement — Oncoimmunology. 2021 Nov 6;10(1):1992880. doi: 10.1080/2162402X.2021.1992880 (PMC8583008; doi:10.1080/2162402x.2021.1992880), 2021-11-06

# Supplementary Figure S1

A.

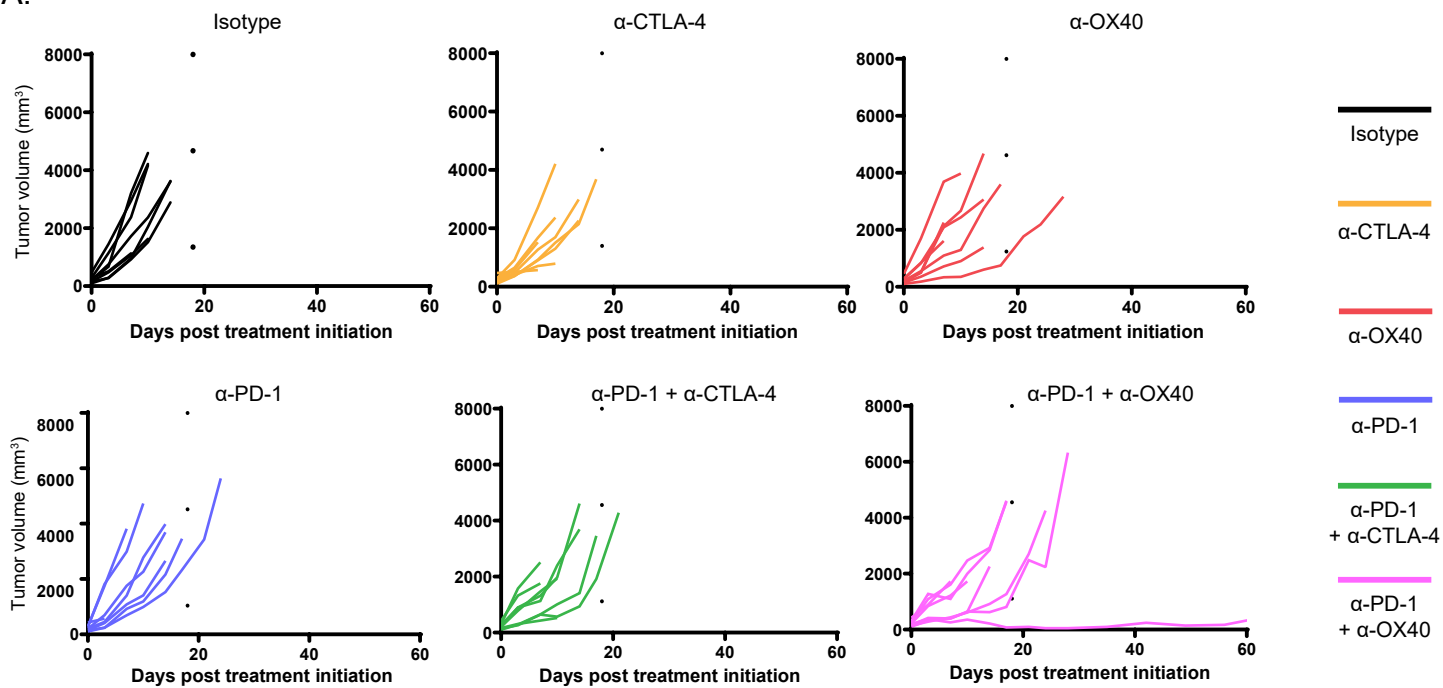

B.

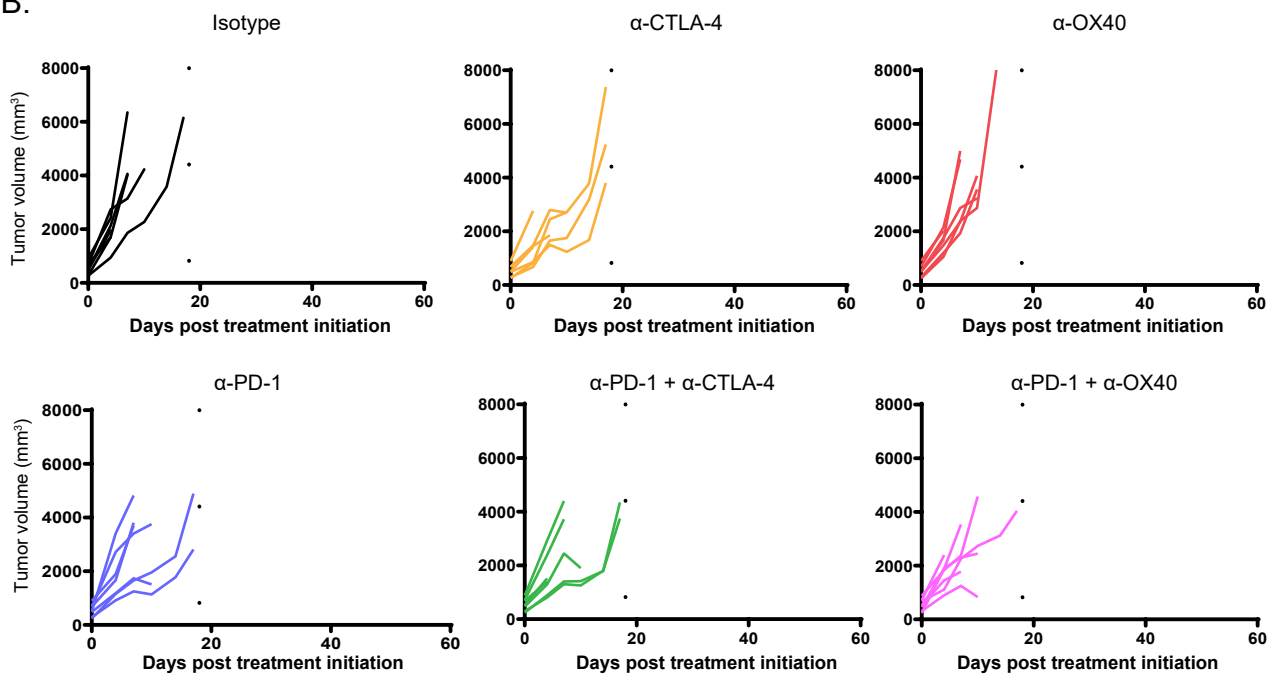

## Supplementary Figure S2

### IHC:

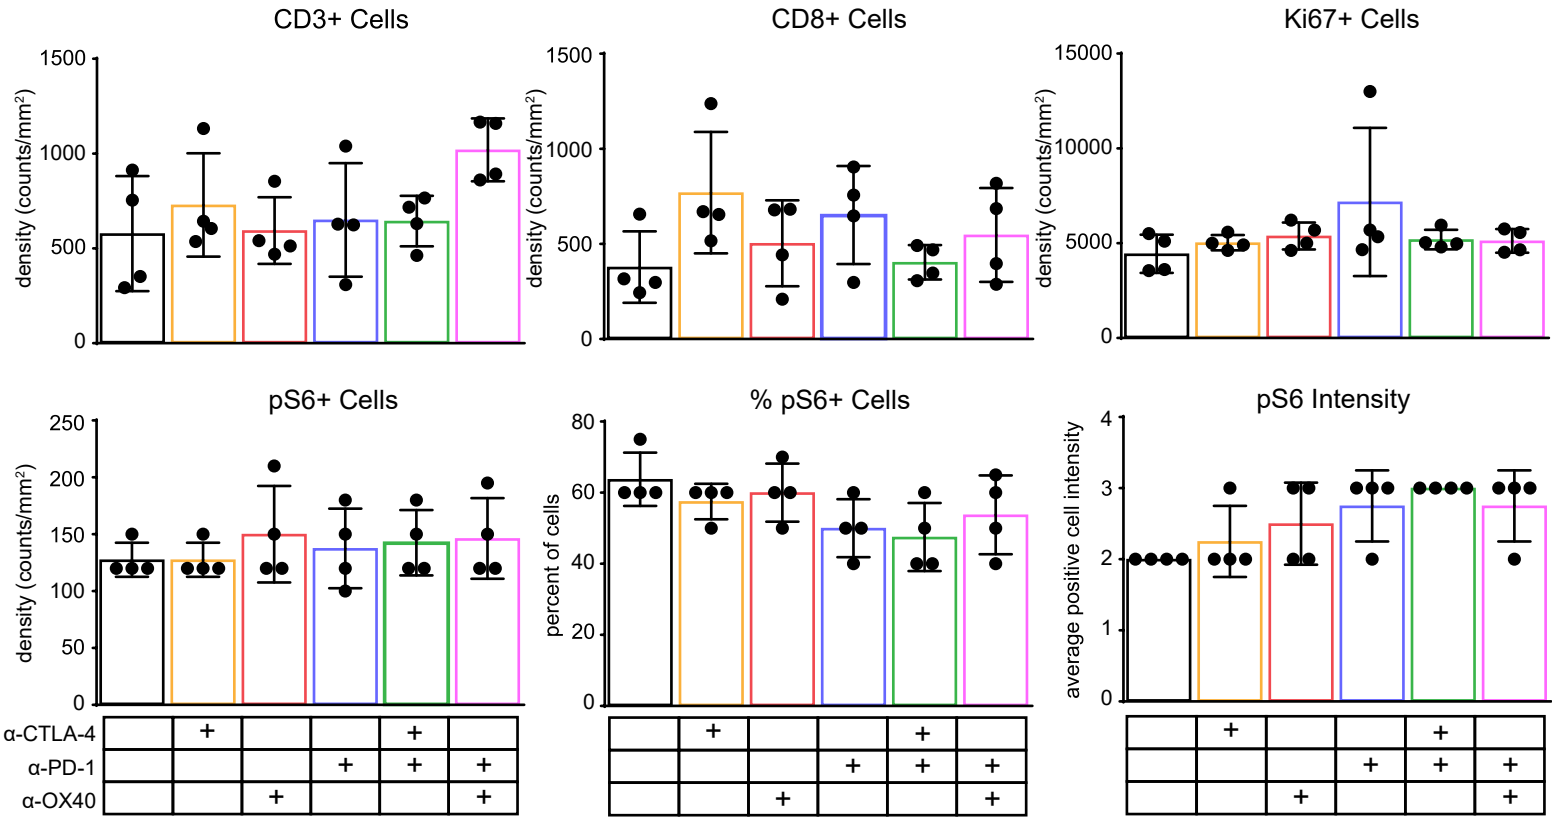

### FACS:

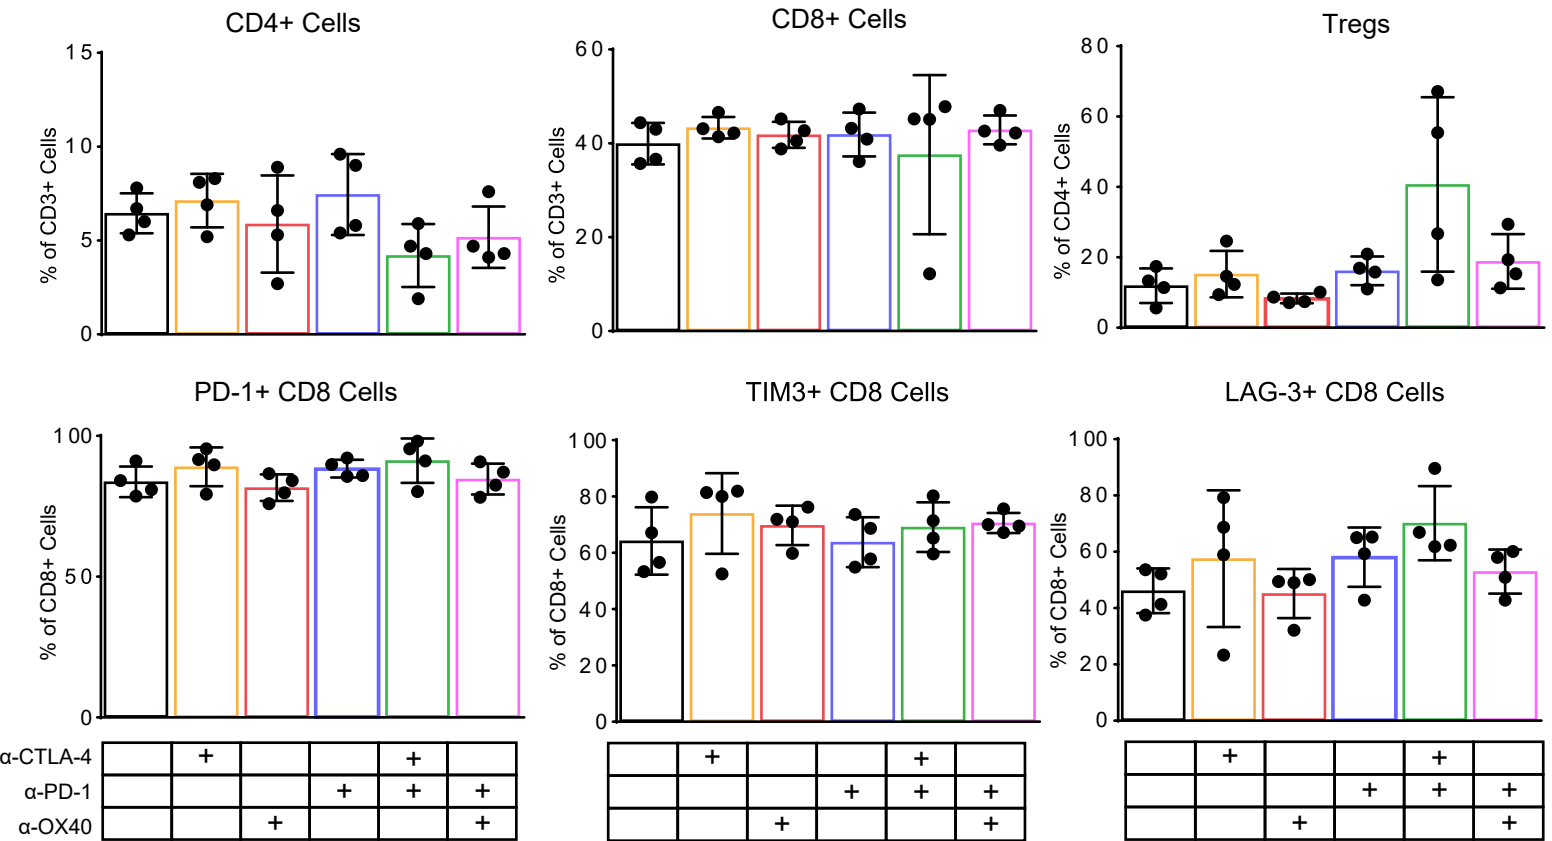



# Supplementary Figure S4

A.

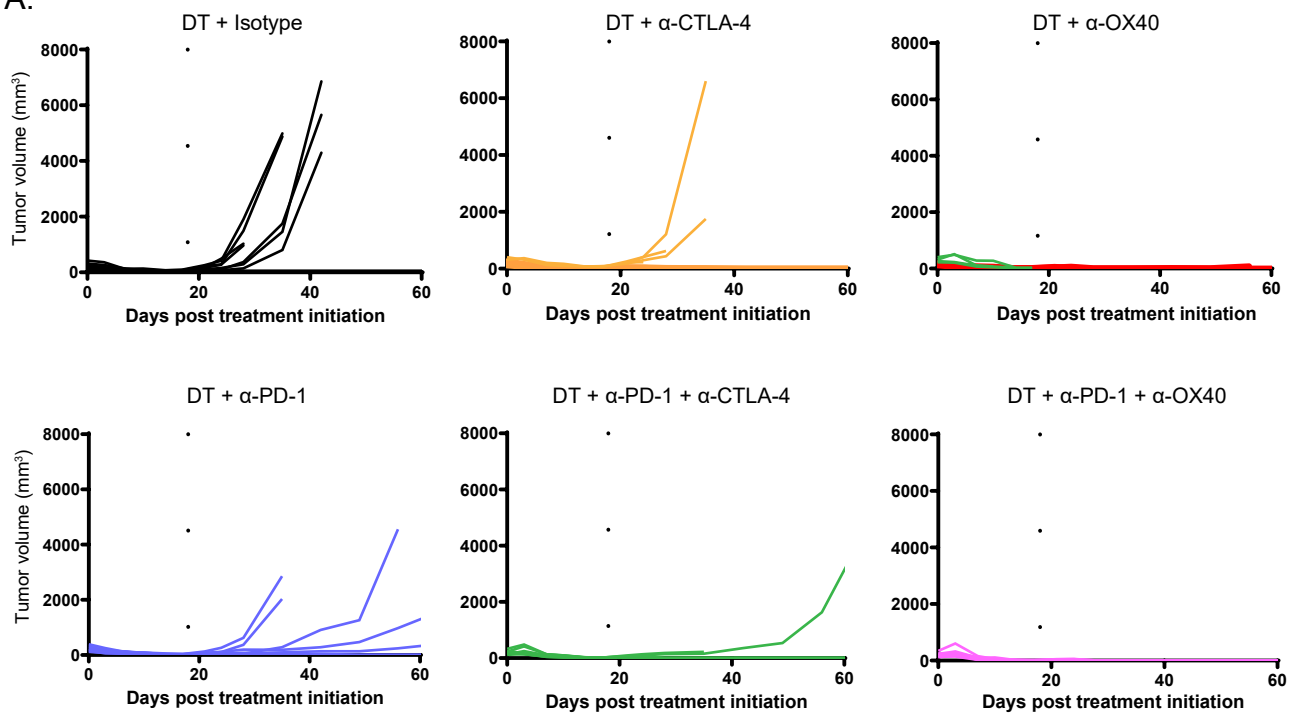

B.

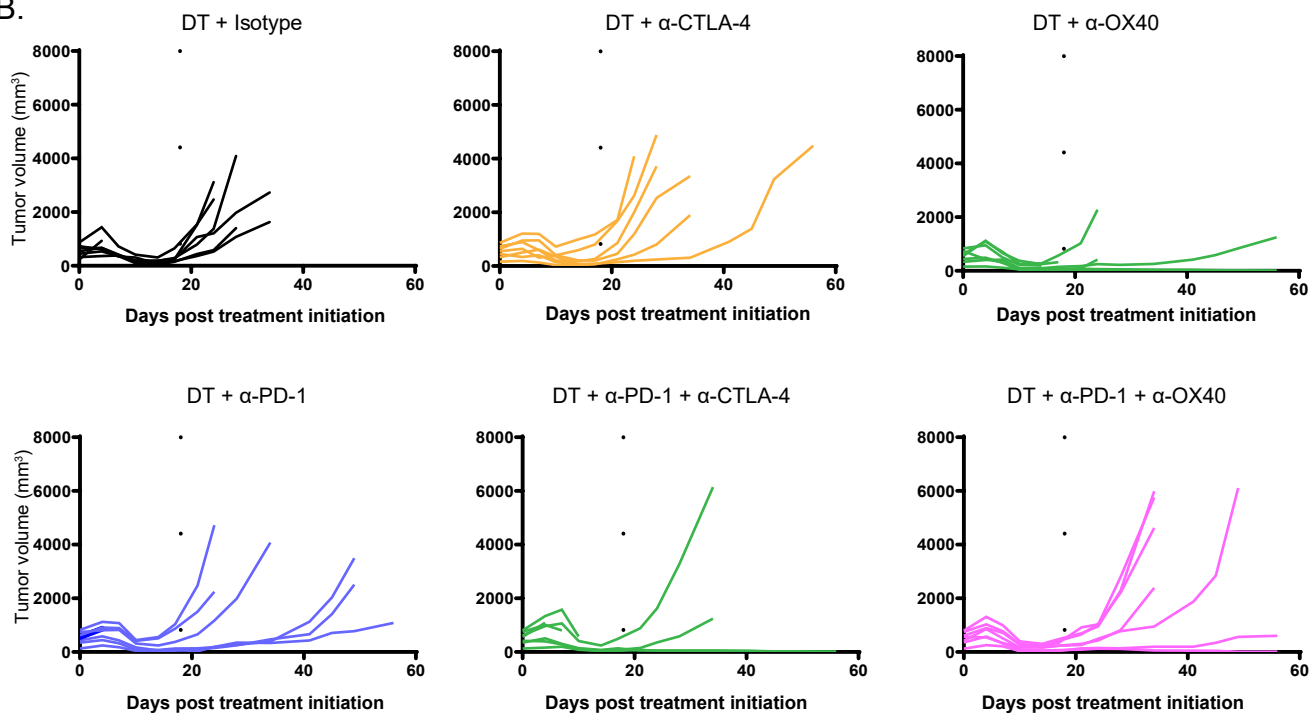

Supplementary Figure S5

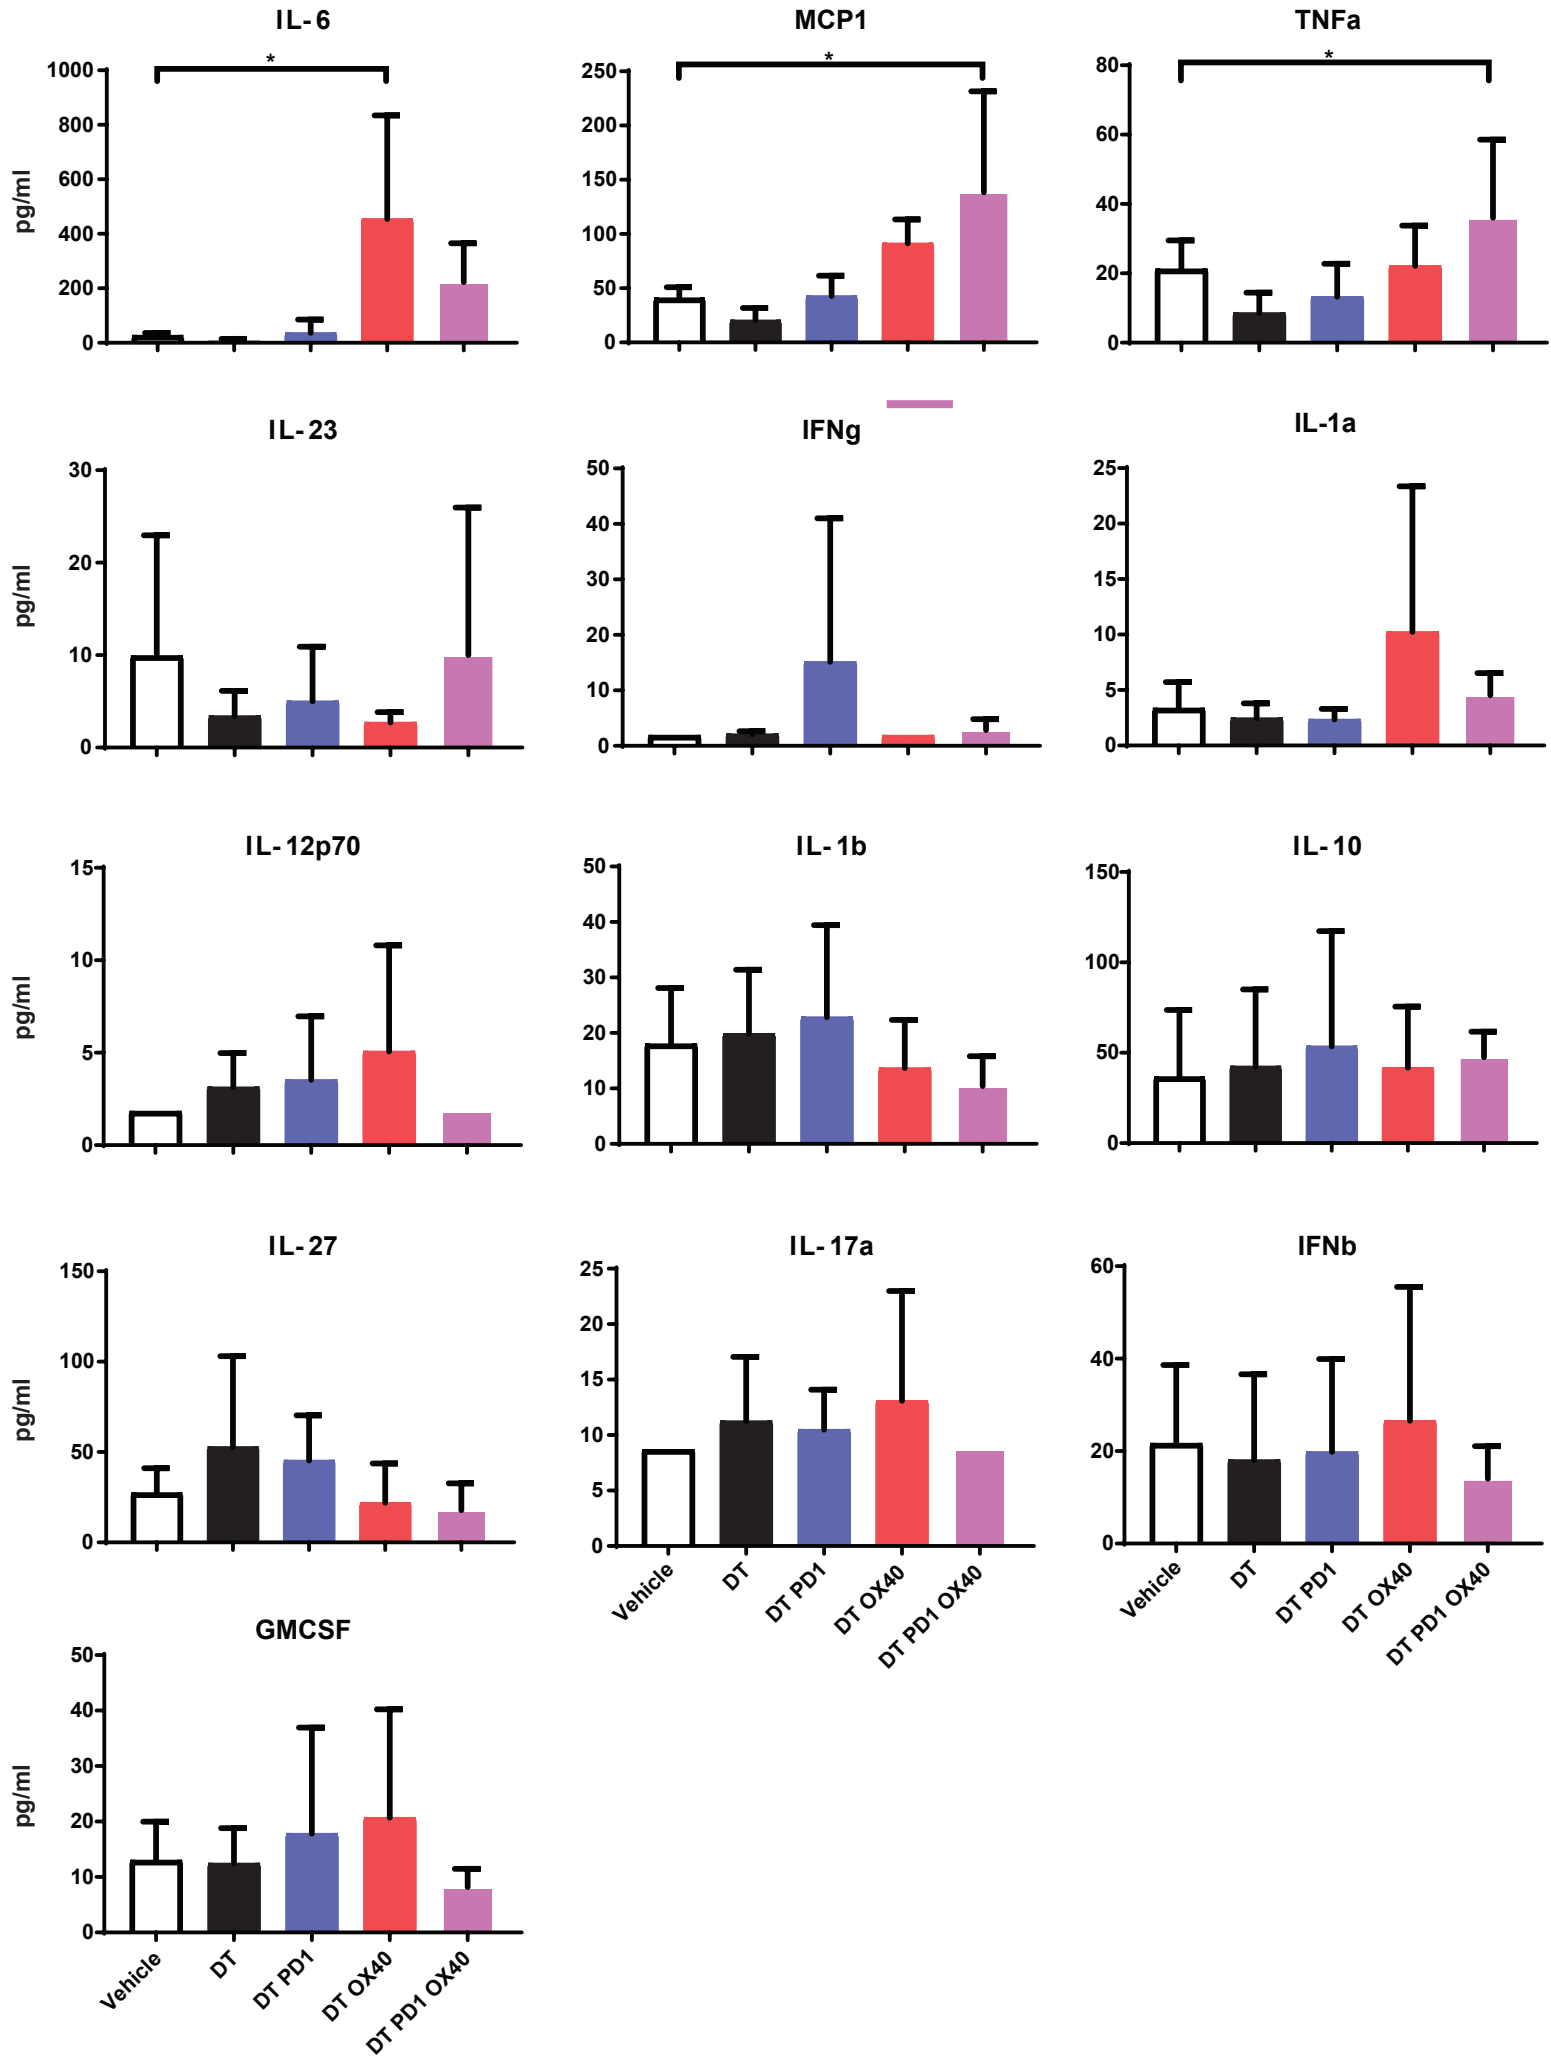



# Supplementary Figure S7

## IHC:

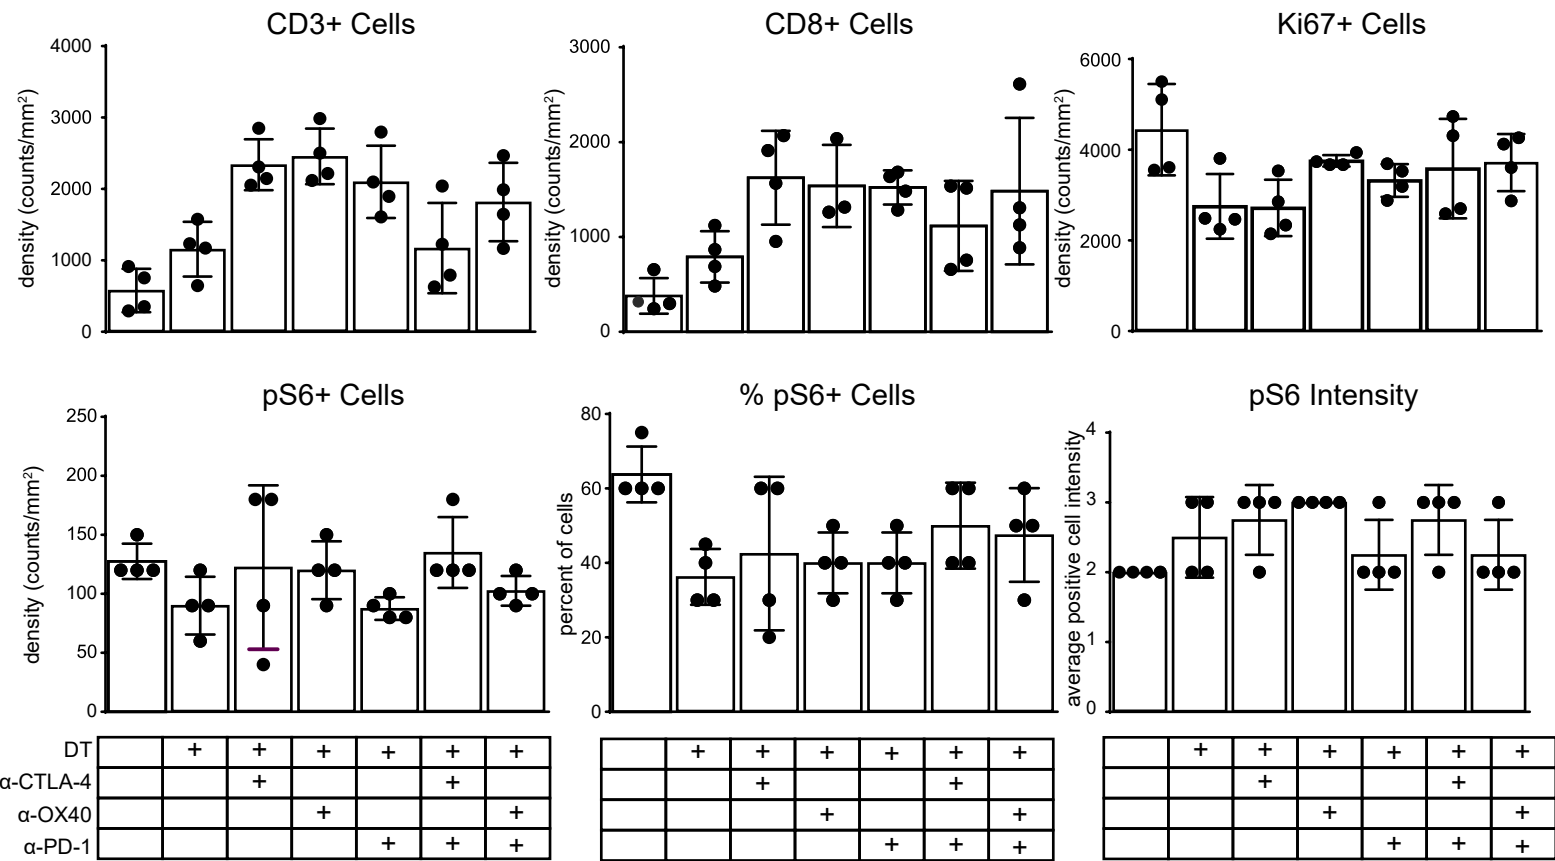

## FACS:

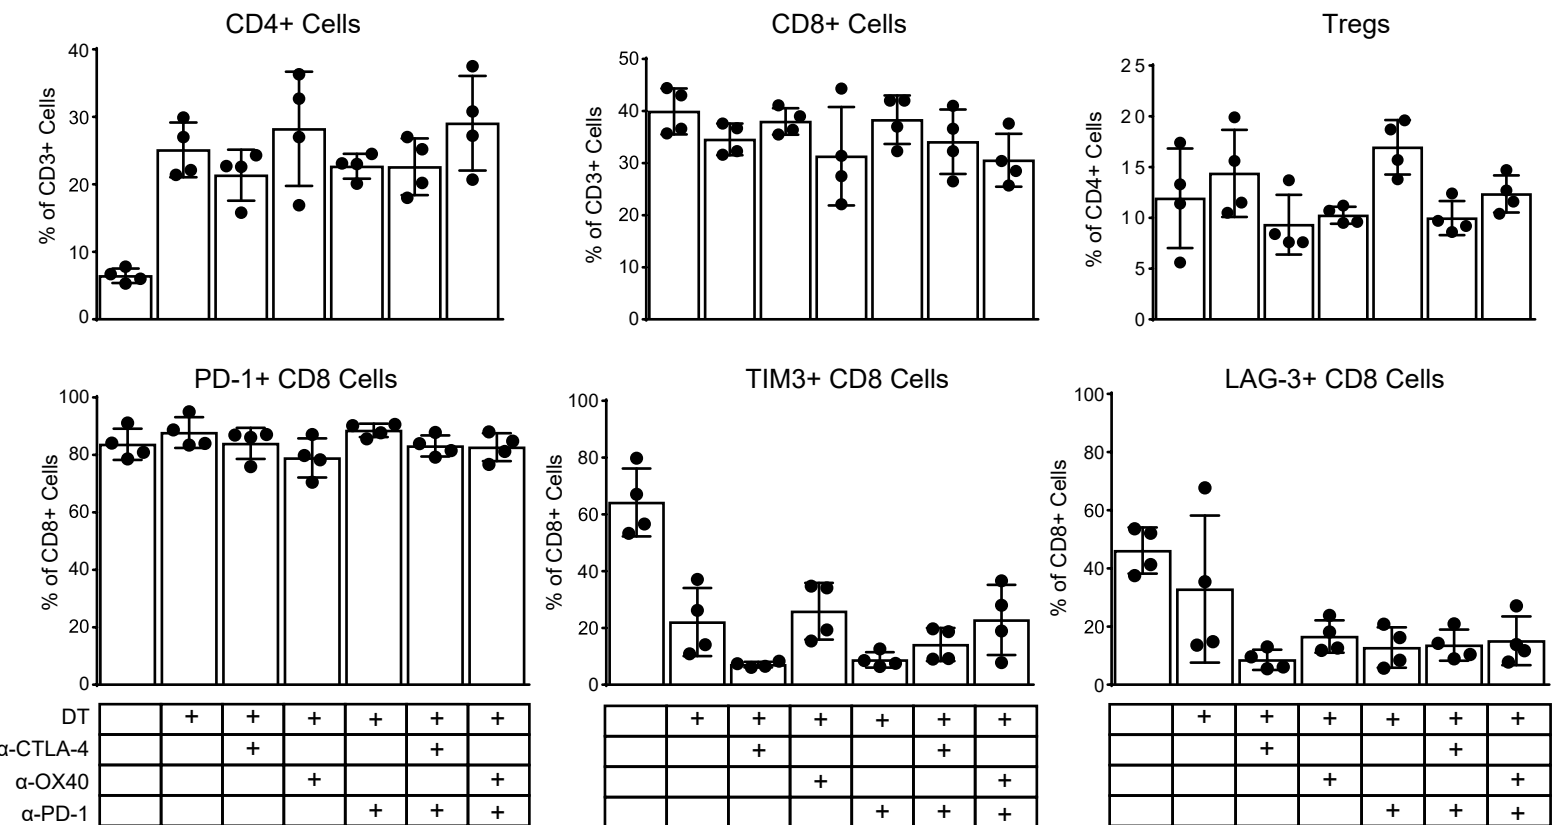

Supplementary Figure S8

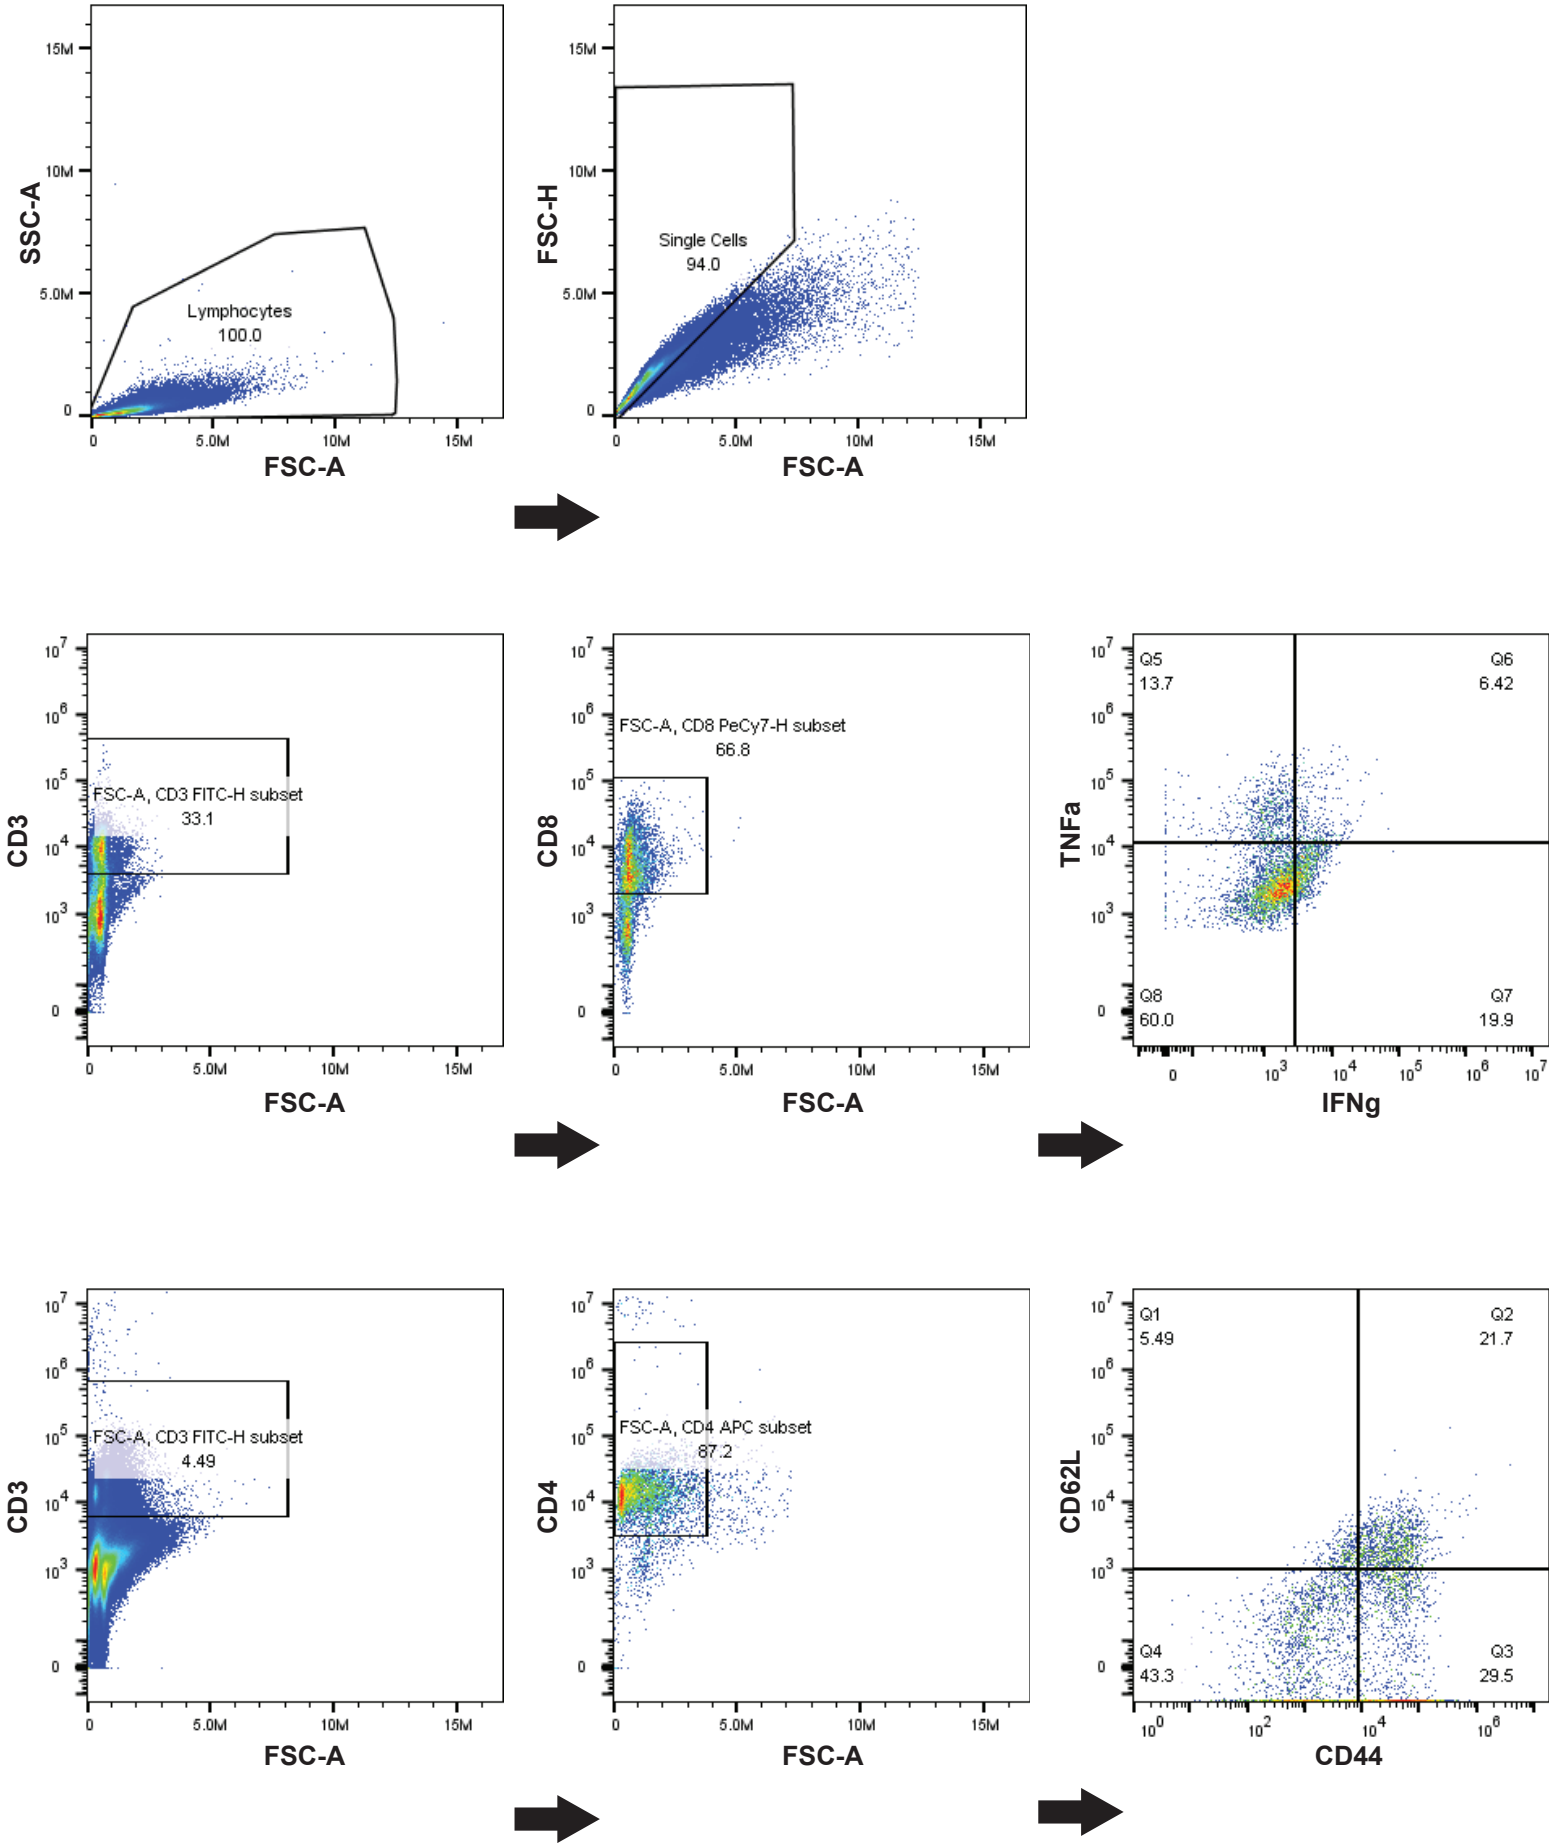

Supplement: KONI_A_1992880_SM1830.pdf [file KONI_A_1992880_SM1830.pdf]
